# Supplementary material for: Measuring the contribution of human mobility to malaria persistence
Source: Springer Nature journal article supplement (doi:10.1186/s12936-020-03474-4), 2020-11-11

# Malaria case probability

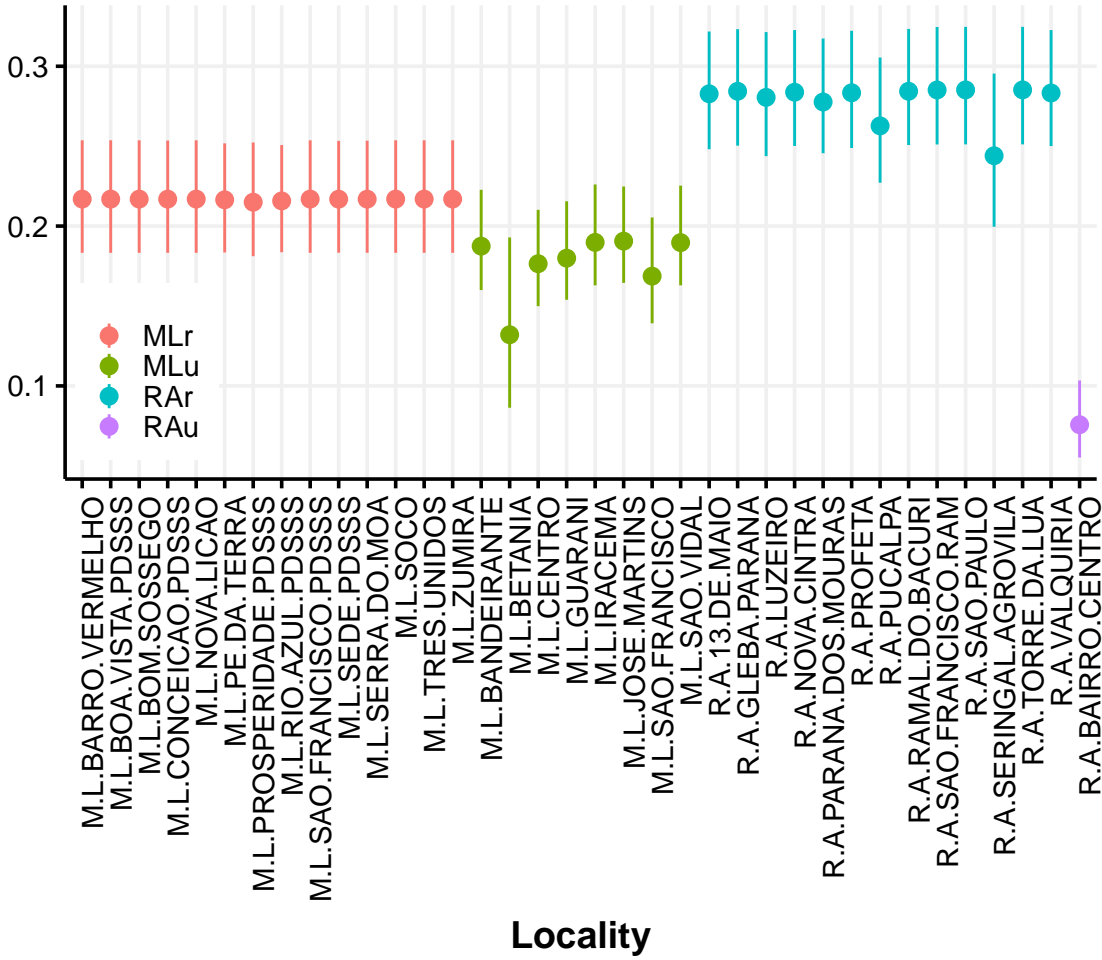

Supplement: MOESM2 [file 18577194]
